# Supplementary material for: Association of VitD 3 deficiency with thyroid nodules suspected of malignancy in petroleum workers: a retrospective cohort study
Source: PeerJ journal article supplement (doi:10.7717/peerj.20893), 2026-02-27

**a**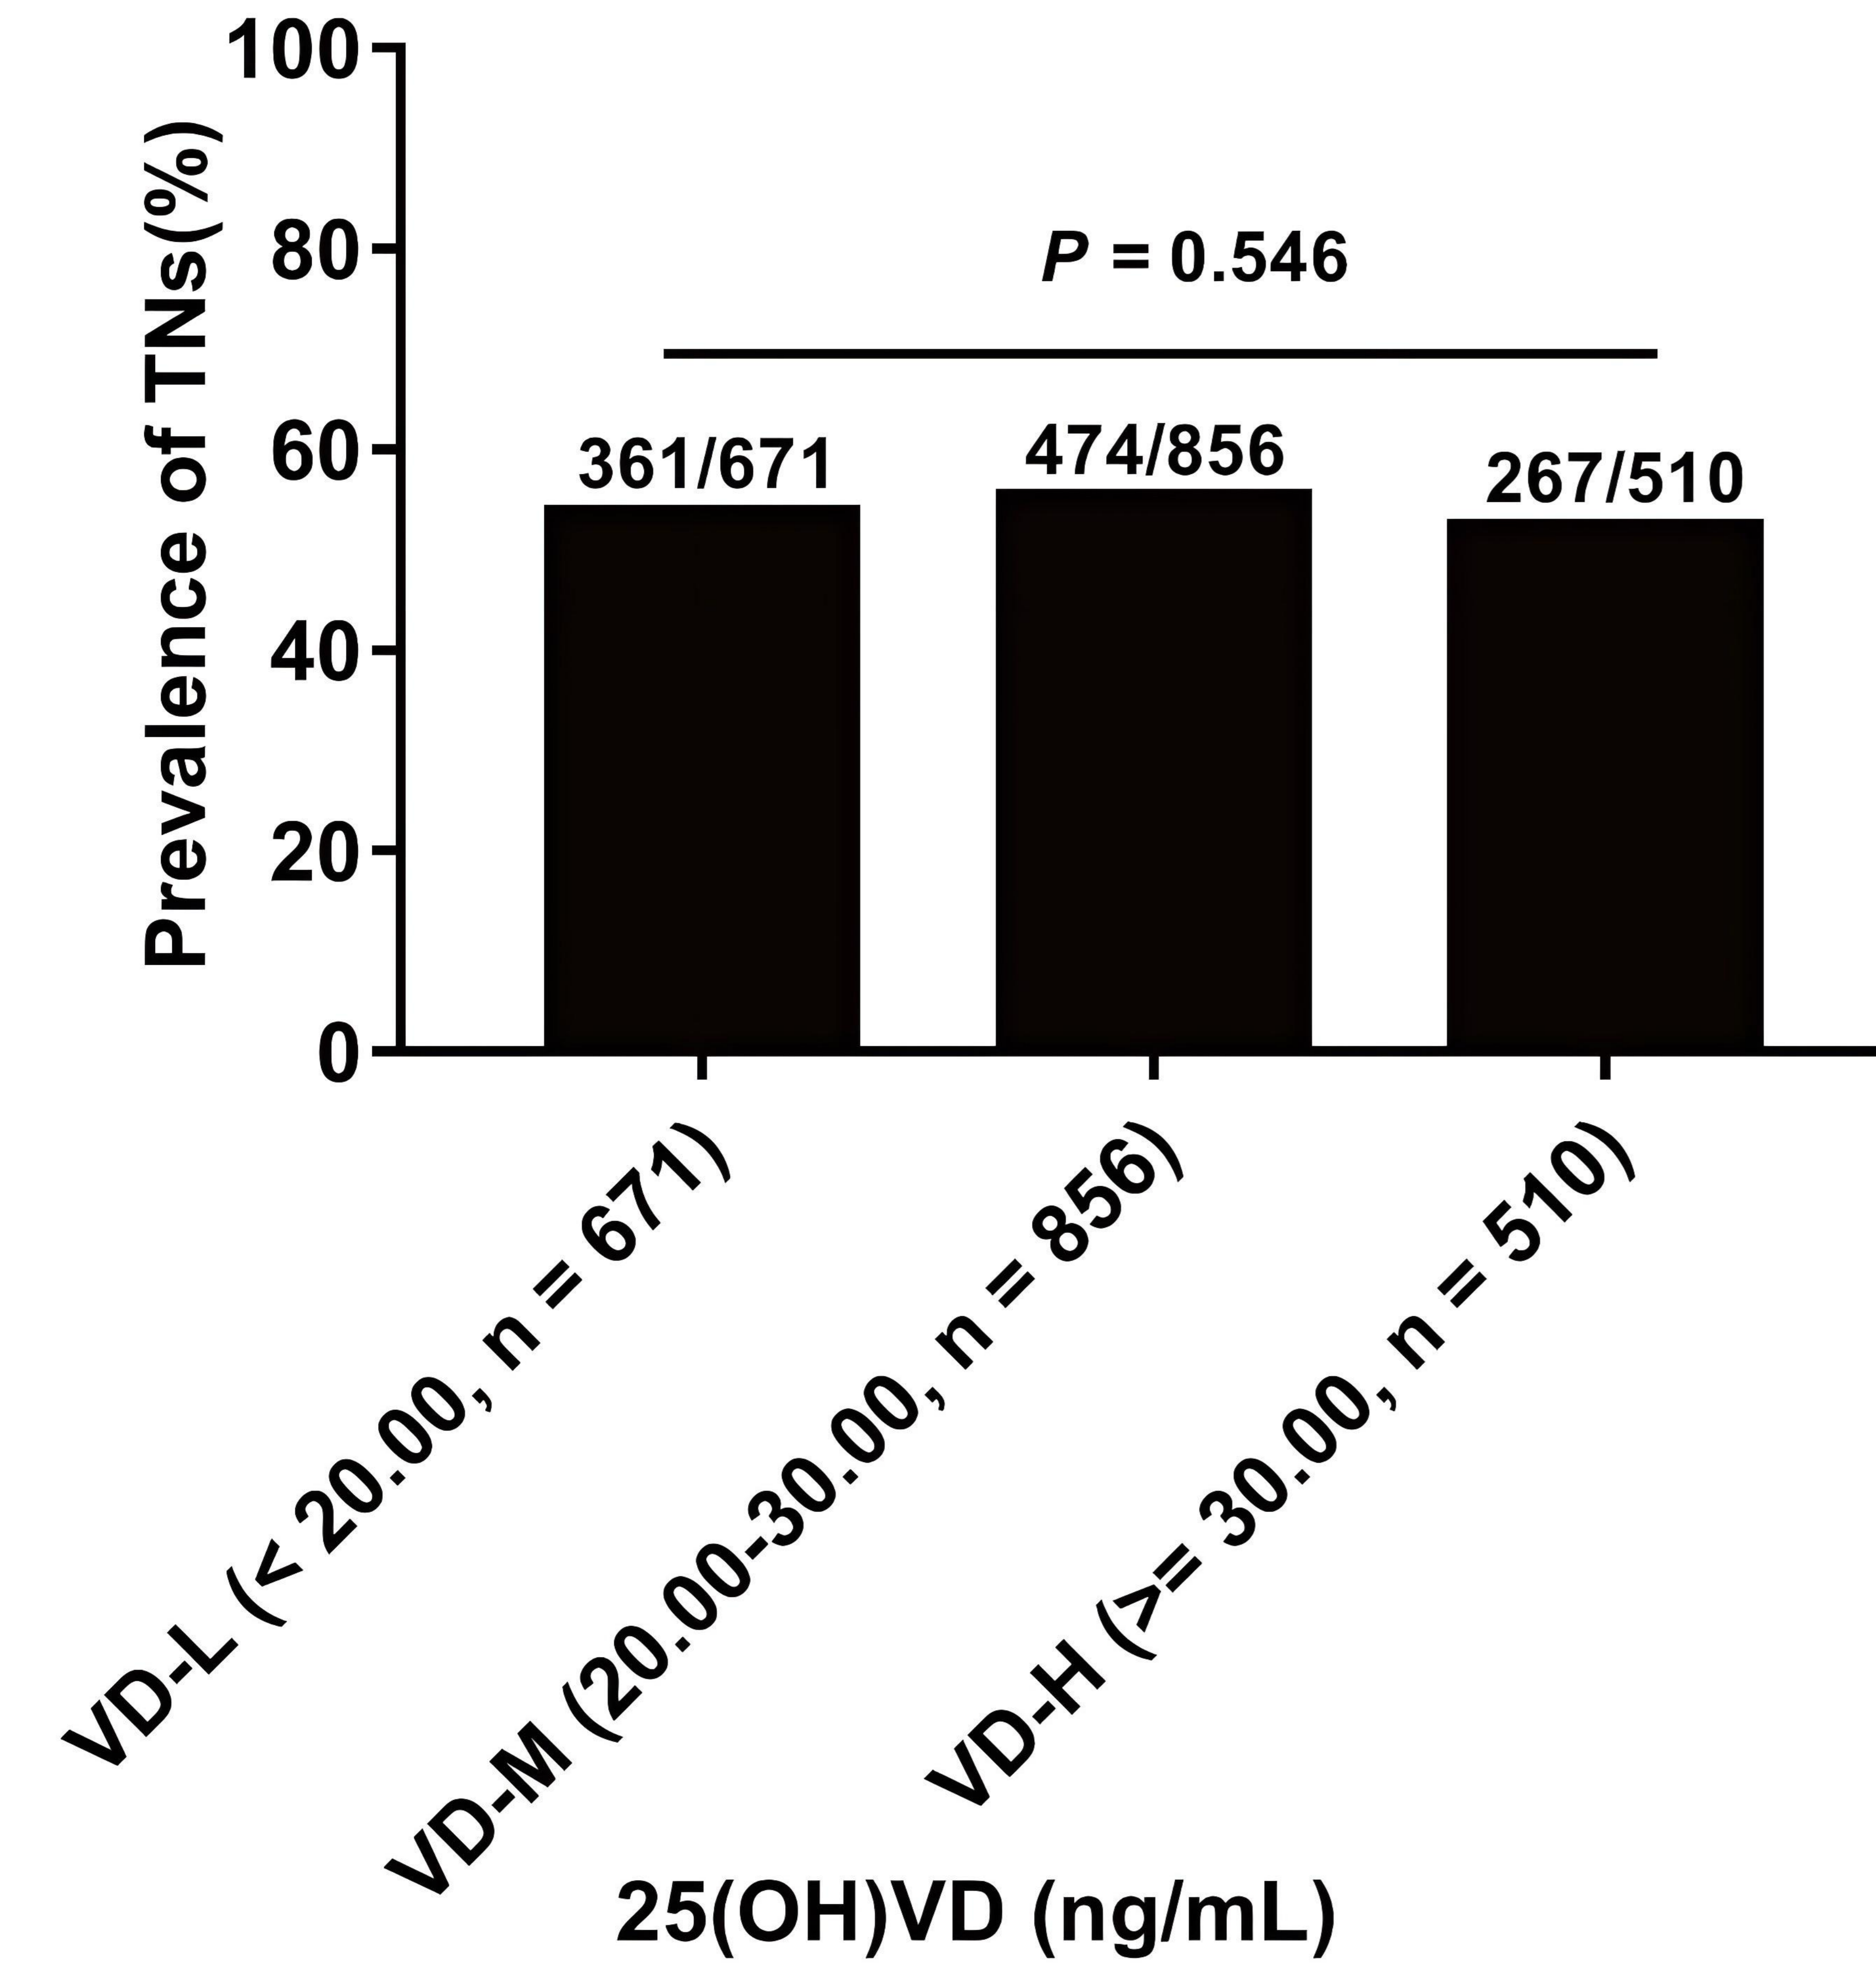**b**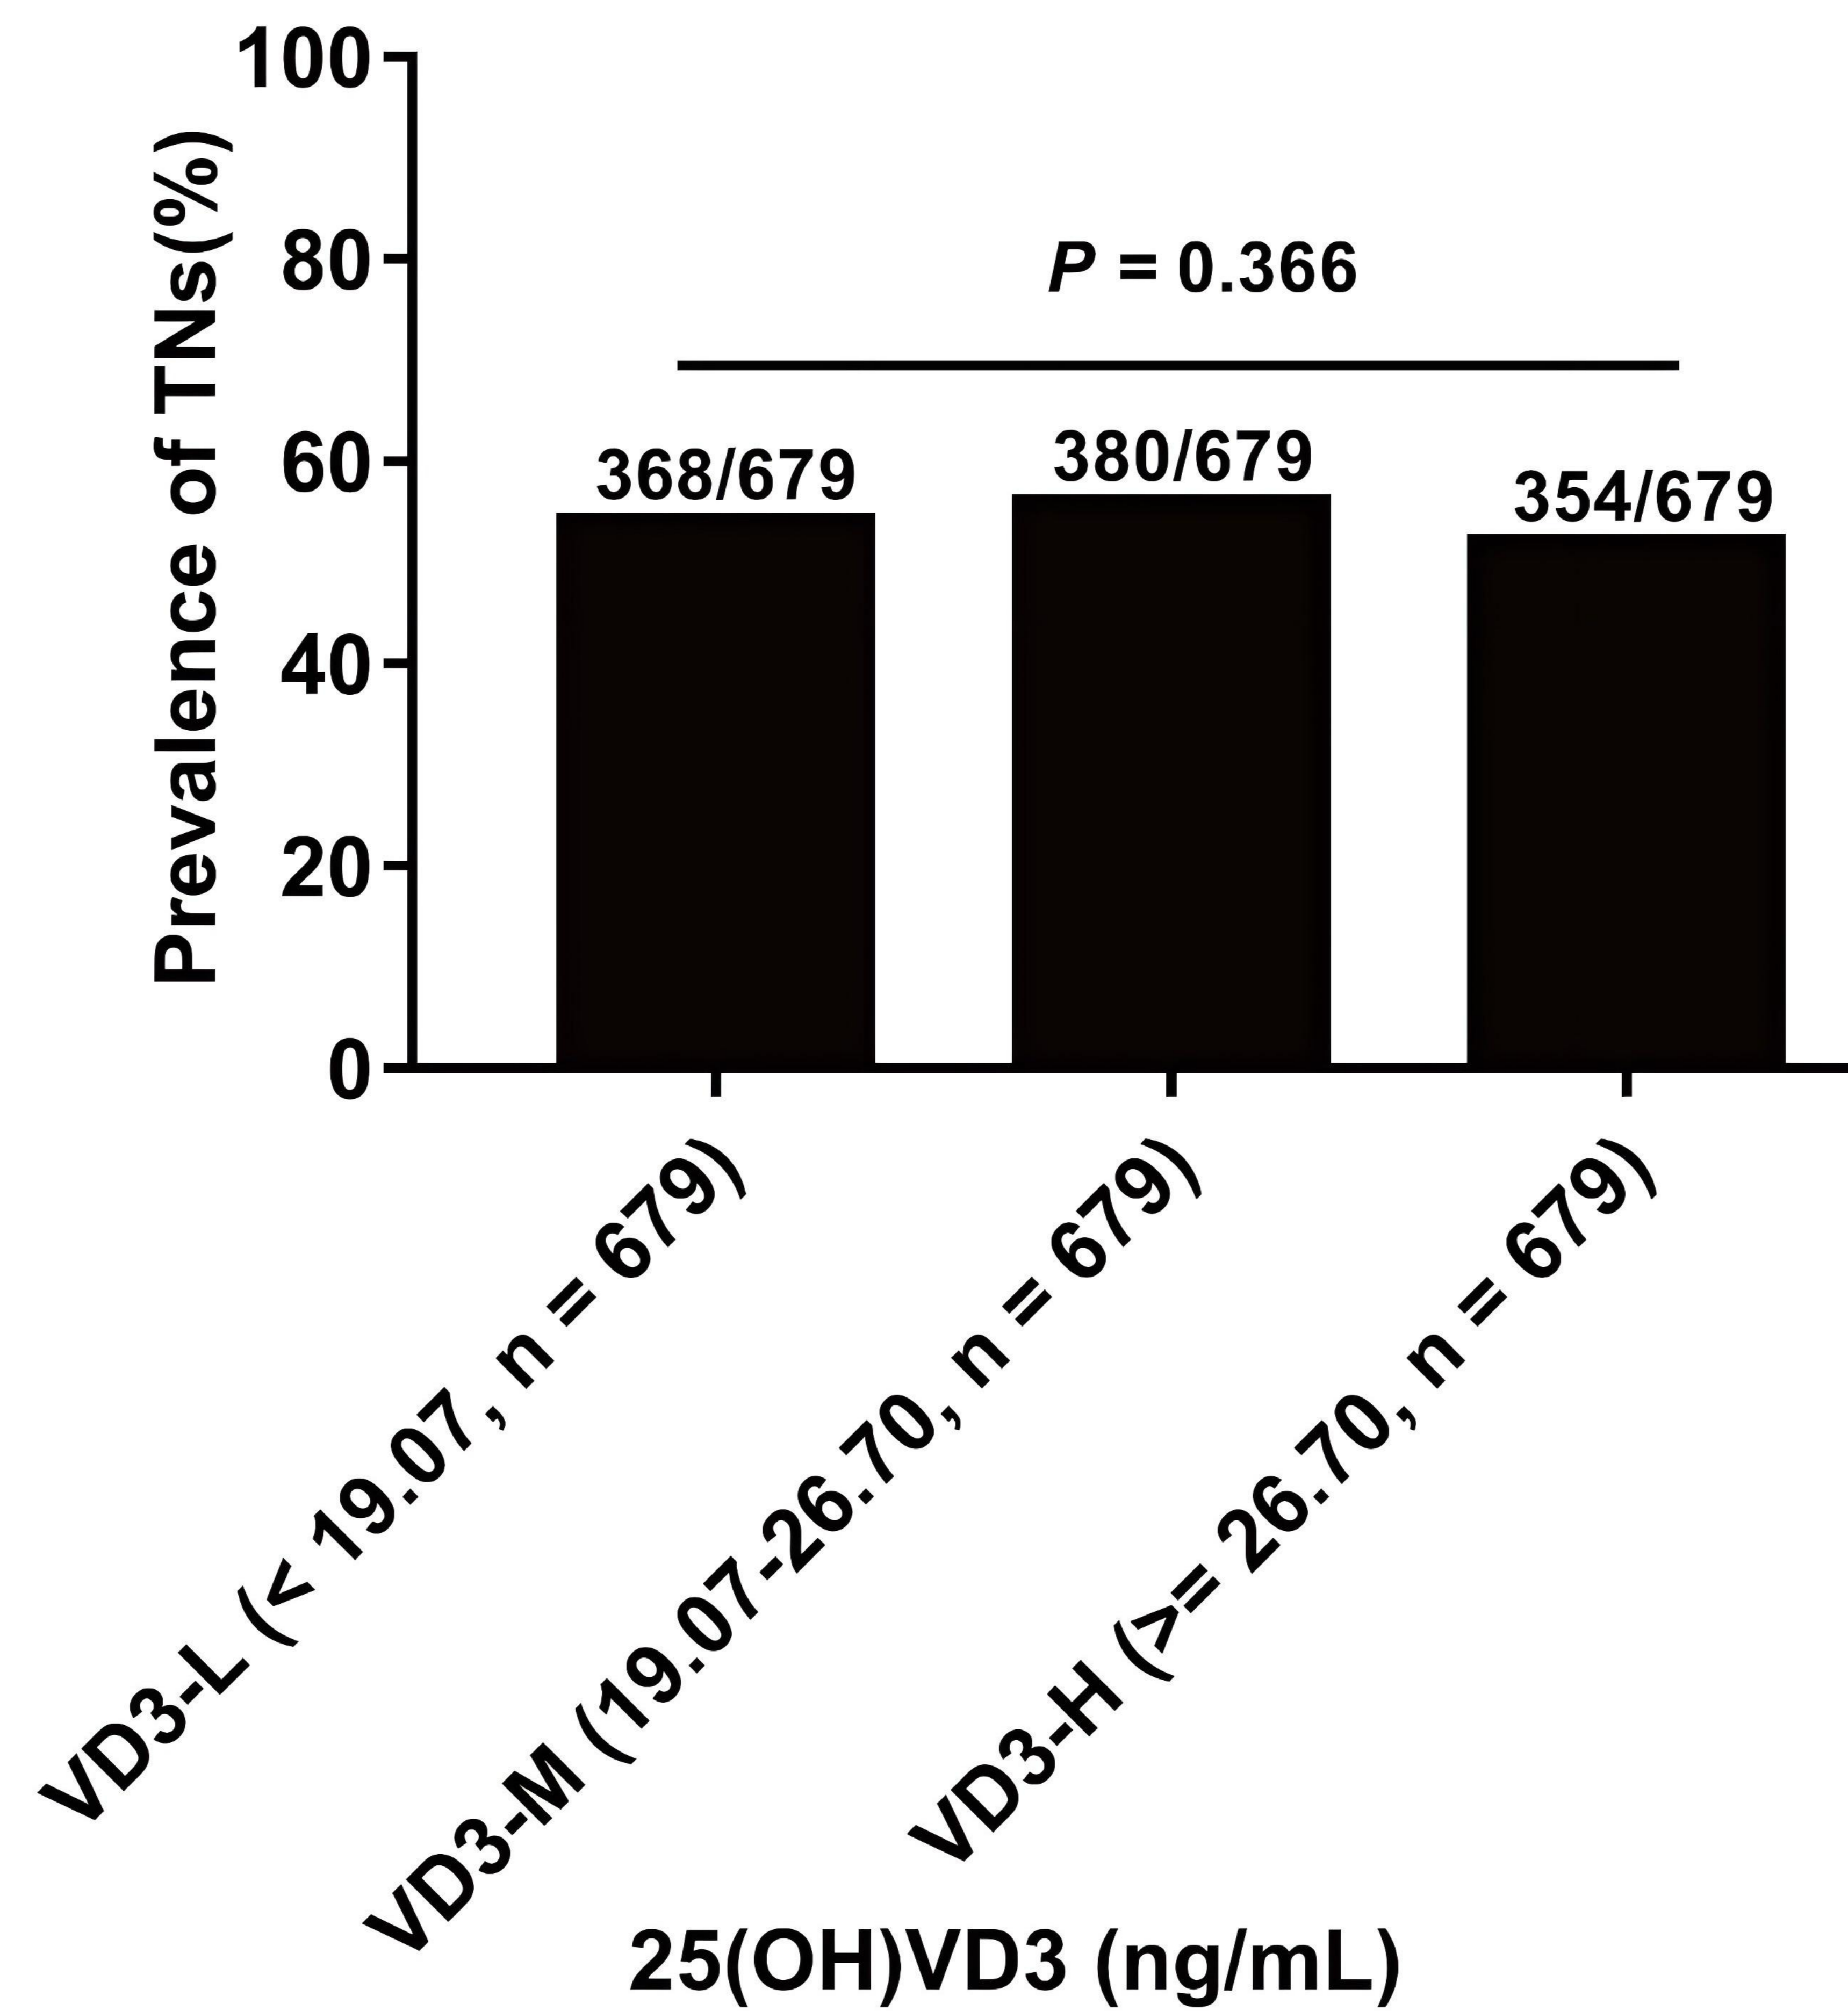**c**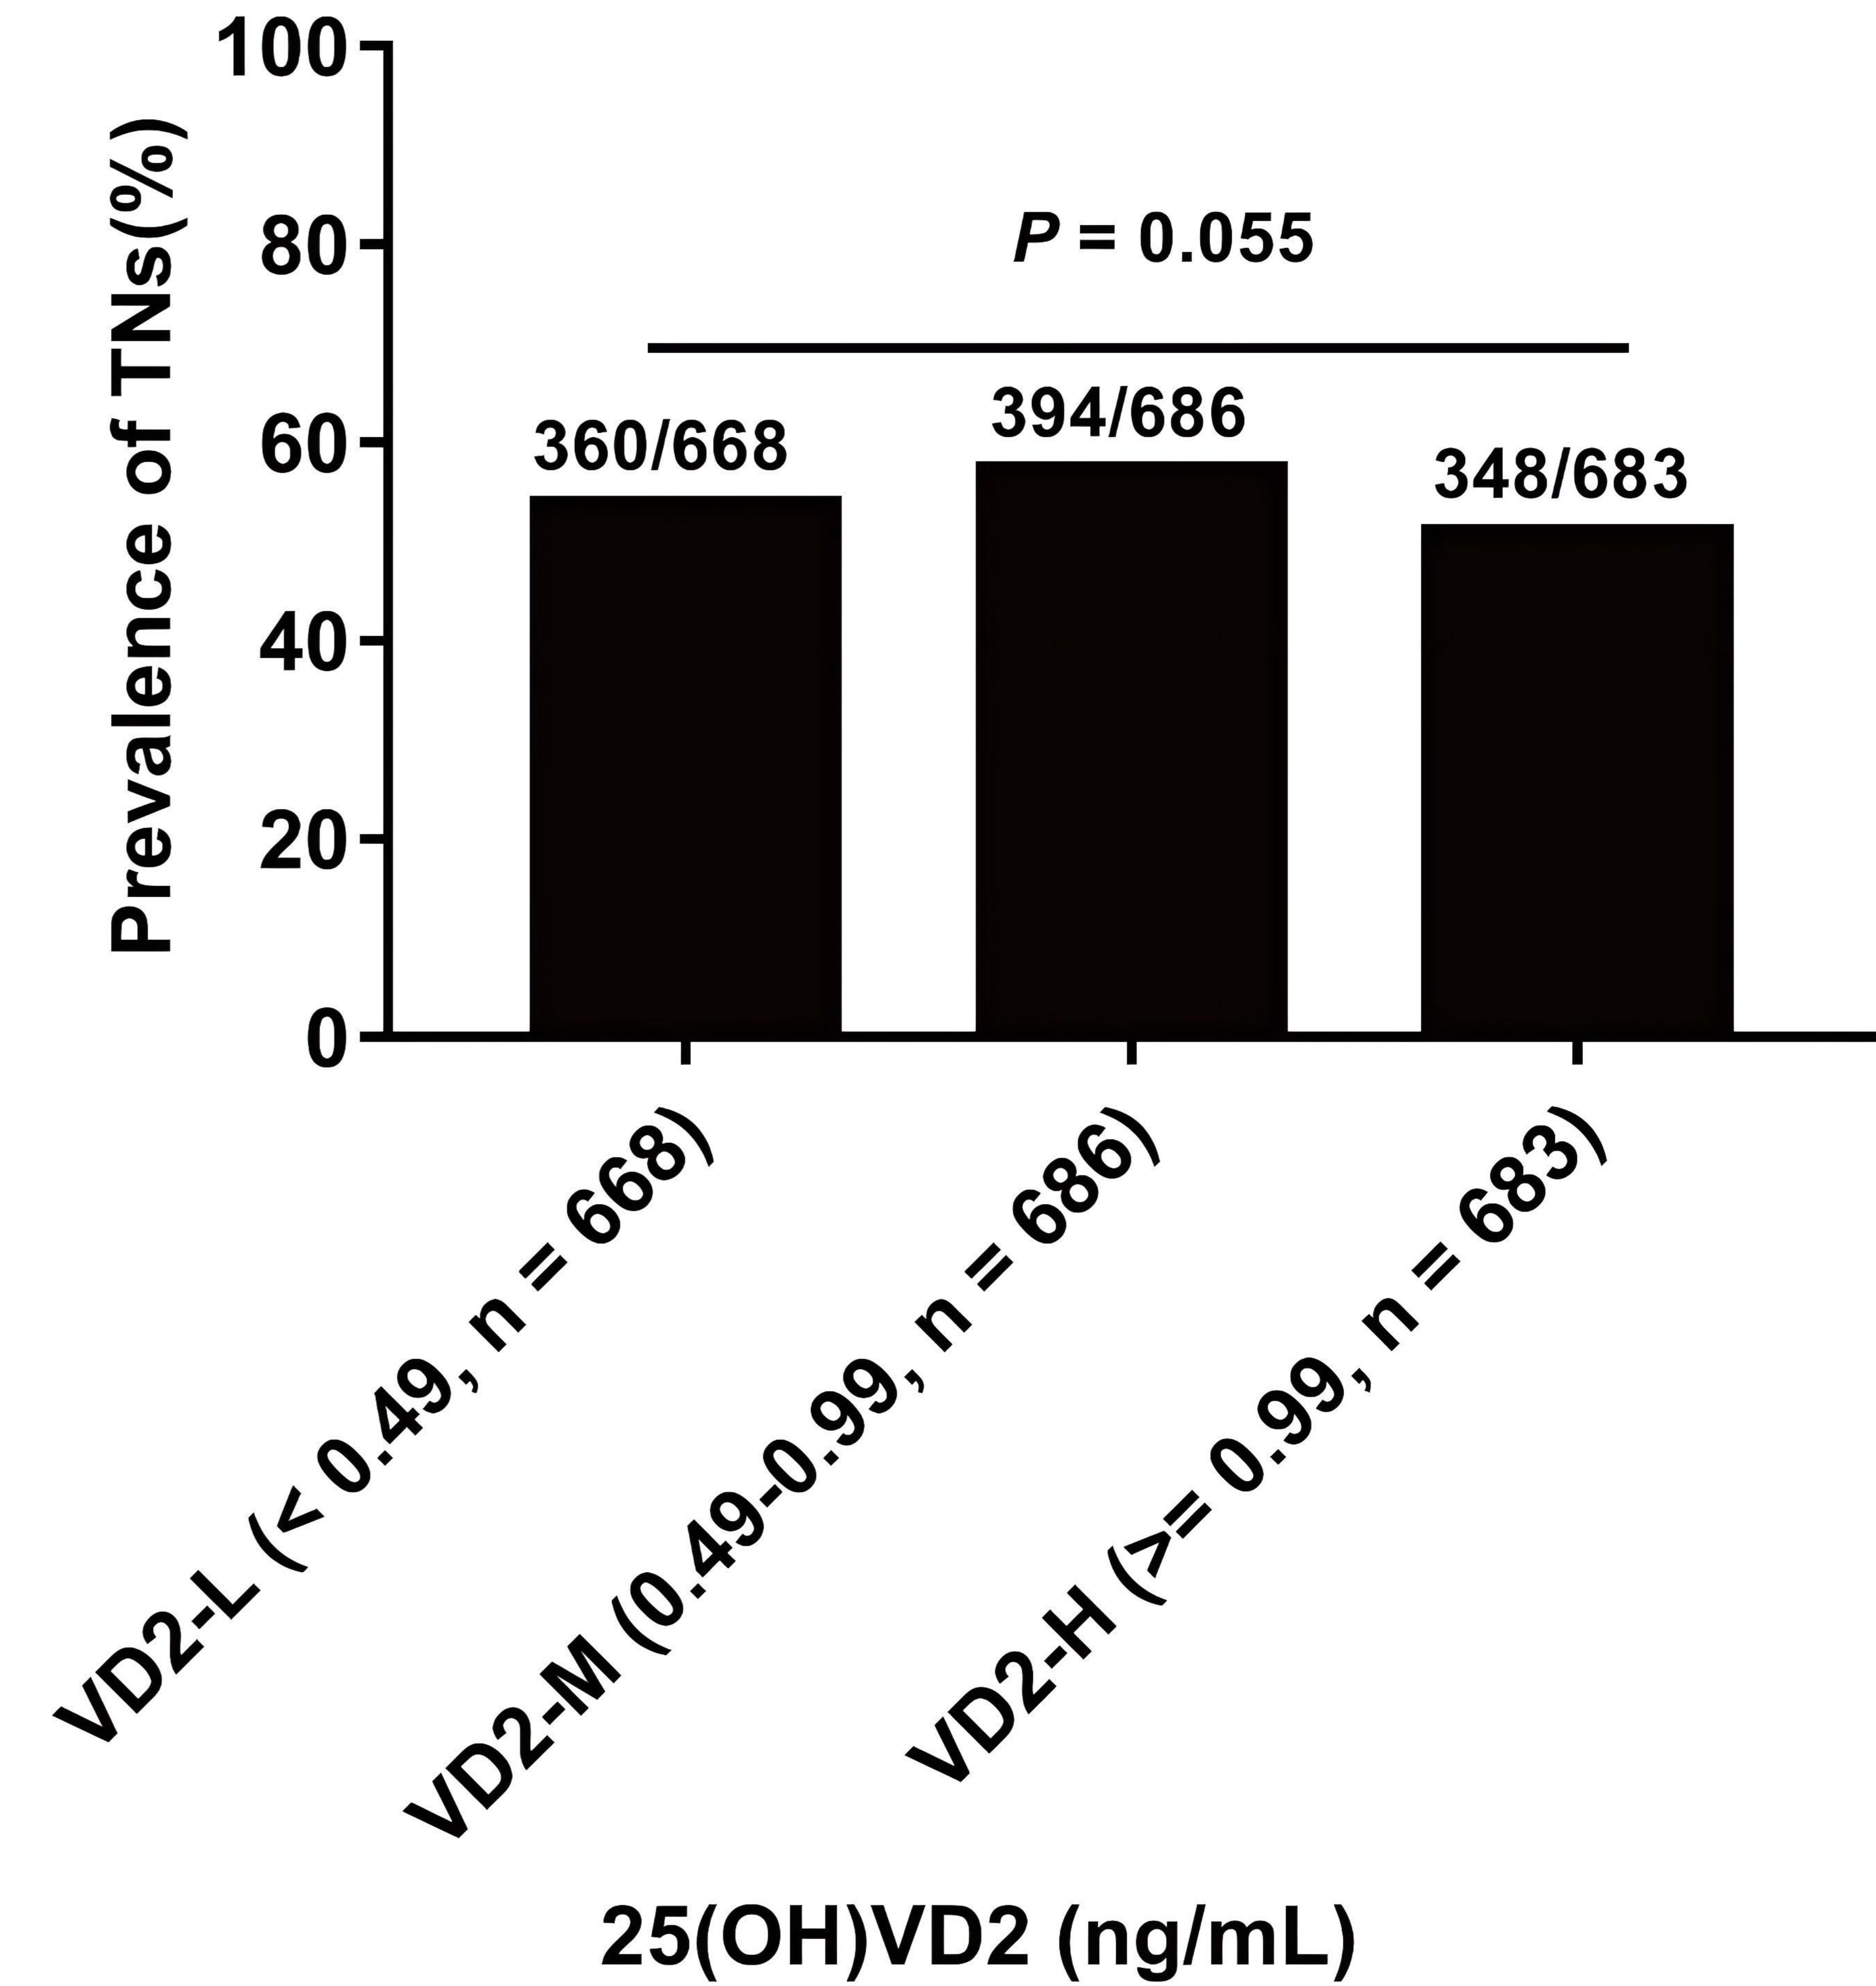

Supplement: Figure_S1.pdf [file Figure_S1.pdf]
